# Supplementary material for: GLIS3 regulates transcription of thyroid hormone biosynthetic genes in coordination with other thyroid transcription factors
Source: PubMed Central journal article supplement (PMC9930322; doi:10.1186/s13578-023-00979-8), 2023-02-15
Supplement: 13578_2023_979_MOESM4_ESM.pdf [file 13578_2023_979_MOESM4_ESM.pdf]

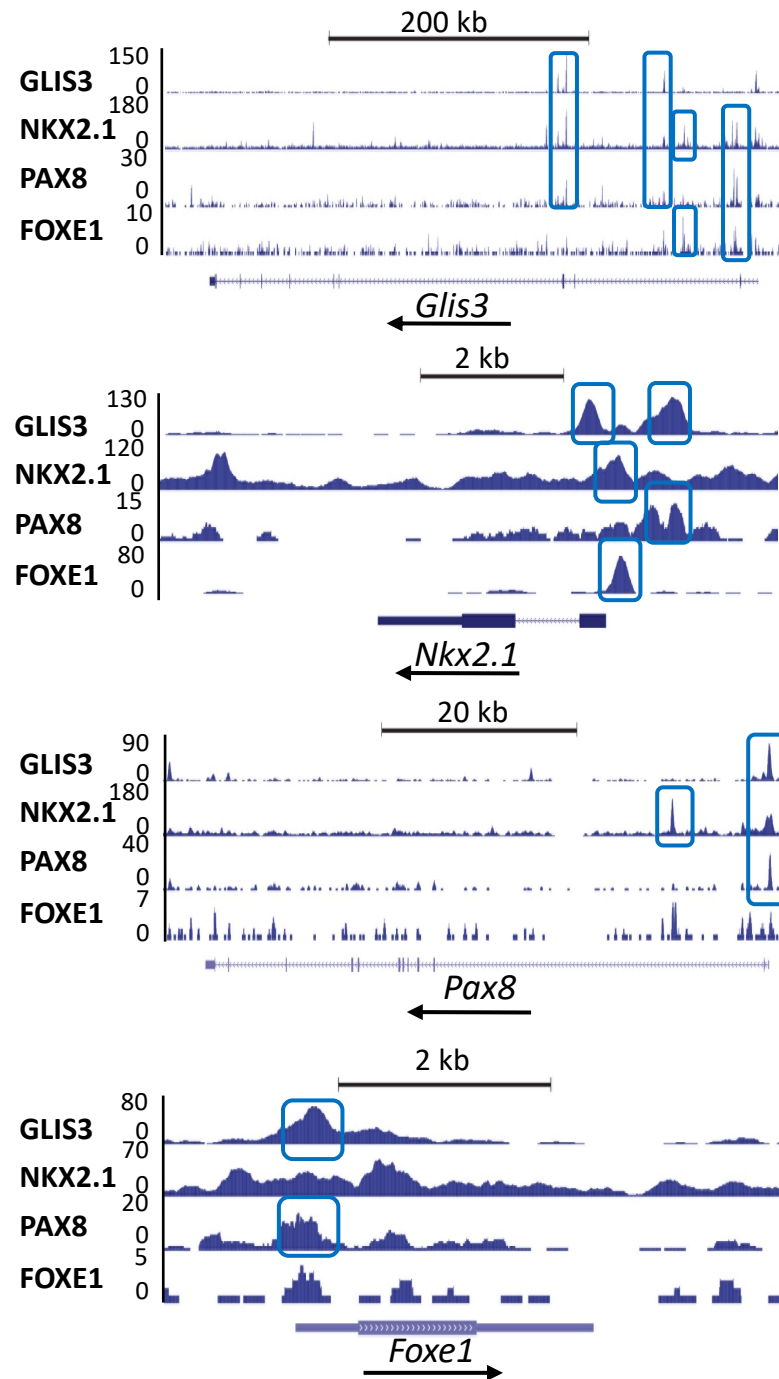

Fig. S4
